# Supplementary material
Source: HighWire-hosted journal article supplement (https://bmjopen.bmj.com/content/13/12/e072403)
Supplement: inline-supplementary-material-1 [file inline-supplementary-material-1.pdf]

## **Appendices to Investigating inequalities in HIV testing in sub-Saharan Africa: spatial analysis of cross-sectional population-based surveys in 25 countries**

Pearl Anne Ante-Testard<sup>\*</sup>, Gabriel Carrasco-Escobar, Tarik Benmarhnia, Laura Temime, Kévin Jean

<sup>\*</sup> Corresponding author: Pearl Anne Ante-Testard

Laboratoire MESuRS, Conservatoire national des Arts et Métiers  
292 rue Saint Martin, 75003 Paris, France  
Email : [pearlannemante@gmail.com](mailto:pearlannemante@gmail.com) or [pearl.ante@ucsf.edu](mailto:pearl.ante@ucsf.edu)

**Table S1. Total number of participants at the country level and primary sampling unit analysis.**

| ISO | Country             | Year    | Female (n cluster) PSU | Female (n/N) country | Participation rate % (Female) † | Male (n cluster) PSU | Male (n/N) country | Participation rate %* (Male) † |
|-----|---------------------|---------|------------------------|----------------------|---------------------------------|----------------------|--------------------|--------------------------------|
| AO  | Angola (WCA)        | 2015-16 | 11 150                 | 14 379 (14 379)      | 100                             | 2 151                | 5 684 (5 684)      | 100                            |
| BI  | Burundi (ESA)       | 2016-17 | 14 912                 | 17 269 (17 269)      | 100                             | 4 039                | 7 552 (7 552)      | 100                            |
| CD  | Congo DR (WCA)      | 2013-14 | 7 939                  | 18 675 (18 827)      | 99.2                            | 2 554                | 8 631 (8 656)      | 99.7                           |
| CI  | Côte d'Ivoire (WCA) | 2011-12 | 8 012                  | 9 902 (10 060)       | 98.4                            | 2382                 | 5 131 (5 135)      | 99.9                           |
| CM  | Cameroon (WCA)      | 2018    | 14 135                 | 14 677 (14 677)      | 100                             | 5 681                | 6 978 (6 978)      | 100                            |
| ET  | Ethiopia (ESA)      | 2016    | 8 722                  | 15 683 (15 683)      | 100                             | 6 869                | 12 688 (12 688)    | 100                            |
| GA  | Gabon (WCA)         | 2012    | 7 171                  | 8 332 (8 422)        | 98.9                            | 4 086                | 5 651 (5 654)      | 99.9                           |
| GH  | Ghana (WCA)         | 2014    | 7 379                  | 9 388 (9 396)        | 99.9                            | 1167                 | 4 388 (4 388)      | 100                            |
| GN  | Guinea (WCA)        | 2018    | 6 258                  | 10 874 (10 874)      | 100                             | 916                  | 4 117 (4 117)      | 100                            |
| LB  | Liberia (WCA)       | 2013    | 8 152                  | 9 192 (9 239)        | 99.5                            | 2 061                | 4 118 (4 118)      | 100                            |
| LS  | Lesotho (ESA)       | 2014    | 6 272                  | 6 621 (6 621)        | 100                             | 806                  | 2 931 (2 931)      | 100                            |
| ML  | Mali (WCA)          | 2012    | 4 753                  | 10 424 (10 424)      | 100                             | 929                  | 4 399 (4 399)      | 100                            |
| MW  | Malawi (ESA)        | 2015-16 | 23 764                 | 24 562 (24 562)      | 100                             | 3 162                | 7 478 (7 478)      | 100                            |
| MZ  | Mozambique (ESA)    | 2015    | 6 675                  | 7 602 (7 749)        | 98.1                            | 3 502                | 5 271 (5 283)      | 99.8                           |
| NA  | Namibia (ESA)       | 2013    | 8 919                  | 9 884 (10 018)       | 98.7                            | 1 484                | 4 474 (4 481)      | 99.8                           |
| RW  | Rwanda (ESA)        | 2014-15 | 11 902                 | 13 449 (13 497)      | 99.6                            | 4 117                | 6 209 (6 217)      | 99.9                           |
| SL  | Sierra Leone (WCA)  | 2019    | 13 331                 | 15 574 (15 574)      | 100                             | 3 371                | 7 197 (7 197)      | 100                            |
| SN  | Senegal (WCA)       | 2017    | 14 577                 | 16 787 (16 787)      | 100                             | 3 065                | 6 977 (6 977)      | 100                            |
| TD  | Chad (WCA)          | 2014-15 | 3 497                  | 17 610 (17 719)      | 99.4                            | 410                  | 5 245 (5 248)      | 99.9                           |

|           |                              |                |        |                    |       |        |                    |      |
|-----------|------------------------------|----------------|--------|--------------------|-------|--------|--------------------|------|
| <b>TG</b> | <b>Togo</b><br>(WCA)         | <b>2013-14</b> | 7 981  | 9 429<br>(9 480)   | 99.5  | 2 204  | 4 473<br>(4 476)   | 99.9 |
| <b>TZ</b> | <b>Tanzania</b><br>(ESA)     | <b>2011-12</b> | 9 220  | 10 836<br>(10 967) | 98.8  | 5 974  | 8 345<br>(8 352)   | 99.9 |
| <b>UG</b> | <b>Uganda</b><br>(ESA)       | <b>2011</b>    | 6 997  | 8 805<br>(12 153)  | 72.5  | 6 334  | 9 588<br>(9 588)   | 100  |
| <b>ZA</b> | <b>South Africa</b><br>(ESA) | <b>2016</b>    | 6 430  | 8 514<br>(8 514)   | 100   | 572    | 3 618<br>(3 618)   | 100  |
| <b>ZM</b> | <b>Zambia</b><br>(ESA)       | <b>2018</b>    | 13 238 | 13 683<br>(13 683) | 100   | 11 470 | 12 132<br>(12 132) | 100  |
| <b>ZW</b> | <b>Zimbabwe</b><br>(ESA)     | <b>2015</b>    | 9 698  | 9 953<br>(9 955)   | 99.98 | 7 893  | 8 396<br>(8 396)   | 100  |

**n cluster**: Total number of participants at the cluster level after excluding missing values for wealth index, recent HIV testing and cluster with less than 10 sample size; **PSU**: Primary Sampling Unit; **n**: Total number of participants after excluding missing values for wealth index and recent HIV testing; **N**: Total number of participants; **WCA**: Western Central Africa; **ESA**: Eastern Southern Africa  
† Participation rate at the country level

**Table S2. Summary estimates of national level HIV prevalence, HIV testing, absolute and relative inequalities in HIV testing uptake in the previous 12 months in 25 sub-Saharan African countries between 2011 and 2019 by country and sex.**

| Country             | Year    | Female |                |                          |                                   |                         | Male   |                |                          |                                   |                         |
|---------------------|---------|--------|----------------|--------------------------|-----------------------------------|-------------------------|--------|----------------|--------------------------|-----------------------------------|-------------------------|
|                     |         | n      | HIV prevalence | HIV testing <sup>†</sup> | SII (x 100) <sup>‡</sup> (95% CI) | RII (95% CI)            | n      | HIV prevalence | HIV testing <sup>†</sup> | SII (x 100) <sup>‡</sup> (95% CI) | RII (95% CI)            |
| AO<br>Angola        | 2015-16 | 14 379 | 3%             | 31%                      | 40<br>(37; 44)                    | 4.07<br>(3.54; 4.69)    | 5 684  | 1%             | 21%                      | 26<br>(21; 31)                    | 3.23<br>(2.63; 3.97)    |
| BI<br>Burundi       | 2016-17 | 17 269 | 1%             | 30%                      | 7<br>(4; 10)                      | 1.26<br>(1.15; 1.39)    | 7 552  | 0.7%           | 21%                      | 7<br>(4; 11)                      | 1.42<br>(1.19; 1.69)    |
| CD<br>Congo DR      | 2013-14 | 18 675 | 2%             | 9%                       | 19<br>(16; 22)                    | 18.29<br>(12.83; 26.08) | 8 631  | 0.5%           | 8%                       | 16<br>(13; 19)                    | 12.83<br>(8.47; 19.43)  |
| CI<br>Côte d'Ivoire | 2011-12 | 9 902  | 15%            | 5%                       | 20<br>(17; 23)                    | 3.65<br>(2.98; 4.48)    | 5 131  | 3%             | 10%                      | 15<br>(12; 19)                    | 5.38<br>(3.68; 7.86)    |
| CM<br>Cameroon      | 2018    | 14 677 | 4%             | 40%                      | 40<br>(36; 44)                    | 2.68<br>(2.43; 2.96)    | 6 978  | 2%             | 35%                      | 42<br>(36; 47)                    | 3.05<br>(2.65; 3.52)    |
| ET<br>Ethiopia      | 2016    | 15 683 | 1%             | 21%                      | 44<br>(39; 48)                    | 4.73<br>(4.13; 5.42)    | 12 688 | 0.5%           | 20%                      | 35<br>(31; 39)                    | 4.11<br>(3.52; 4.79)    |
| GA<br>Gabon         | 2012    | 8 332  | 6%             | 35%                      | 16<br>(12; 20)                    | 1.68<br>(1.45; 1.94)    | 5 651  | 3%             | 24%                      | 23<br>(20; 27)                    | 3.52<br>(2.80; 4.42)    |
| GH<br>Ghana         | 2014    | 9 388  | 3%             | 14%                      | 11<br>(8; 13)                     | 2.11<br>(1.74; 2.56)    | 4 388  | 1%             | 7%                       | 11<br>(8; 15)                     | 5.75<br>(3.25; 10.15)   |
| GN<br>Guinea        | 2018    | 10 874 | 2%             | 9%                       | 23<br>(19; 26)                    | 11.09<br>(8.20; 14.98)  | 4 117  | 1%             | 6%                       | 15<br>(11; 20)                    | 12.25<br>(7.17; 20.95)  |
| LB<br>Liberia       | 2013    | 9 192  | 2%             | 22%                      | 5<br>(1; 8)                       | 1.26<br>(1.06; 1.49)    | 4 118  | 2%             | 14%                      | 14<br>(10; 17)                    | 3.28<br>(2.30; 4.66)    |
| LS<br>Lesotho       | 2014    | 6 621  | 30%            | 59%                      | -10<br>(-14; -5)                  | 0.85<br>(0.79; 0.92)    | 2 931  | 19%            | 38%                      | 23<br>(16; 29)                    | 1.82<br>(1.53; 2.17)    |
| ML<br>Mali          | 2012    | 10 424 | 1%             | 7%                       | 26<br>(21; 30)                    | 22.66<br>(16.15; 31.78) | 4 399  | 0.9%           | 7%                       | 20<br>(15; 25)                    | 14.74<br>(8.89; 24; 44) |
| MW<br>Malawi        | 2015-16 | 24 562 | 11%            | 44%                      | 0.8<br>(-2; 3)                    | 1.02<br>(0.96; 1.08)    | 7 478  | 7%             | 42%                      | -0.2<br>(-4; 4)                   | 0.996<br>(0.91; 1.09)   |
| MZ<br>Mozambique    | 2015    | 7 602  | 15%            | 31%                      | 27<br>(22; 32)                    | 2.04<br>(1.76; 2.36)    | 5 271  | 10%            | 20%                      | 32<br>(26; 37)                    | 3.35<br>(2.77; 4.04)    |

|                    |                |        |      |     |                  |                       |        |      |     |                |                       |
|--------------------|----------------|--------|------|-----|------------------|-----------------------|--------|------|-----|----------------|-----------------------|
| NA<br>Namibia      | <b>2013</b>    | 9 884  | 17%  | 51% | -4<br>(-8; -0.5) | 0.91<br>(0.85; 0.99)  | 4 474  | 11%  | 39% | 17<br>(12; 22) | 1.57<br>(1.36; 1.81)  |
| RW<br>Rwanda       | <b>2014-15</b> | 13 449 | 4%   | 40% | 3<br>(-0.2; 7)   | 1.08<br>(0.99; 1.18)  | 6 209  | 2%   | 37% | -3<br>(-7; 1)  | 0.92<br>(0.82; 1.04)  |
| SL<br>Sierra Leone | <b>2019</b>    | 15 574 | 2%   | 23% | 12<br>(9; 16)    | 1.74<br>(1.50; 2.02)  | 7 197  | 1%   | 13% | 20<br>(16; 24) | 4.93<br>(3.71; 6.56)  |
| SN<br>Senegal      | <b>2017</b>    | 16 787 | 0.5% | 13% | 5<br>(3; 7)      | 1.47<br>(1.25; 1.74)  | 6 977  | 0.5% | 6%  | 8<br>(6; 11)   | 4.48<br>(3.02; 6.65)  |
| TD<br>Chad         | <b>2014-15</b> | 17 610 | 2%   | 3%  | 5<br>(3; 6)      | 6.82<br>(4.34; 10.72) | 5 245  | 1%   | 8%  | 16<br>(11; 20) | 9.09<br>(5.58; 14.80) |
| TG<br>Togo         | <b>2013-14</b> | 9 429  | 3%   | 17% | 19<br>(15; 22)   | 3.15<br>(2.58; 3.85)  | 4 473  | 2%   | 12% | 21<br>(17; 25) | 6.90<br>(4.84; 9.84)  |
| TZ<br>Tanzania     | <b>2011-12</b> | 10 836 | 6%   | 33% | 12<br>(8; 15)    | 1.44<br>(1.29; 1.61)  | 8 345  | 4%   | 28% | 13<br>(9; 17)  | 1.61<br>(1.41; 1.85)  |
| UG<br>Uganda       | <b>2011</b>    | 8 805  | 8%   | 12% | 5<br>(2; 7)      | 1.48<br>(1.18; 1.85)  | 9 588  | 6%   | 12% | 5<br>(2; 7)    | 1.46<br>(1.17; 1.82)  |
| ZA<br>South Africa | <b>2016</b>    | 8 514  | 28%  | 60% | -8<br>(-12; -4)  | 0.87<br>(0.82; 0.93)  | 3 618  | 14%  | 45% | 9<br>(3; 14)   | 1.21<br>(1.06; 1.38)  |
| ZM<br>Zambia       | <b>2018</b>    | 13 683 | 14%  | 65% | 9<br>(5; 13)     | 1.15<br>(1.07; 1.22)  | 12 132 | 8%   | 53% | 14<br>(10; 18) | 1.31<br>(1.22; 1.41)  |
| ZW<br>Zimbabwe     | <b>2015</b>    | 9 953  | 17%  | 49% | -4<br>(-7; -0.5) | 0.92<br>(0.86; 0.99)  | 8 396  | 11%  | 37% | 7<br>(3; 11)   | 1.19<br>(1.08; 1.32)  |
| Average            |                |        | 8%   | 29% |                  |                       |        | 5%   | 23% |                |                       |

n: Total number of participants after excluding missing values for wealth index and recent HIV testing; SII: Slope index of inequality; RII:

Relative index of inequality; 95% CI: 95% Confidence Interval.

† Self-reported recent (< 12 months) uptake of HIV testing.

‡ SII values and their 95% CIs were multiplied by 100 so that they may be easily interpreted as percentage point differences (instead of proportion differences).s

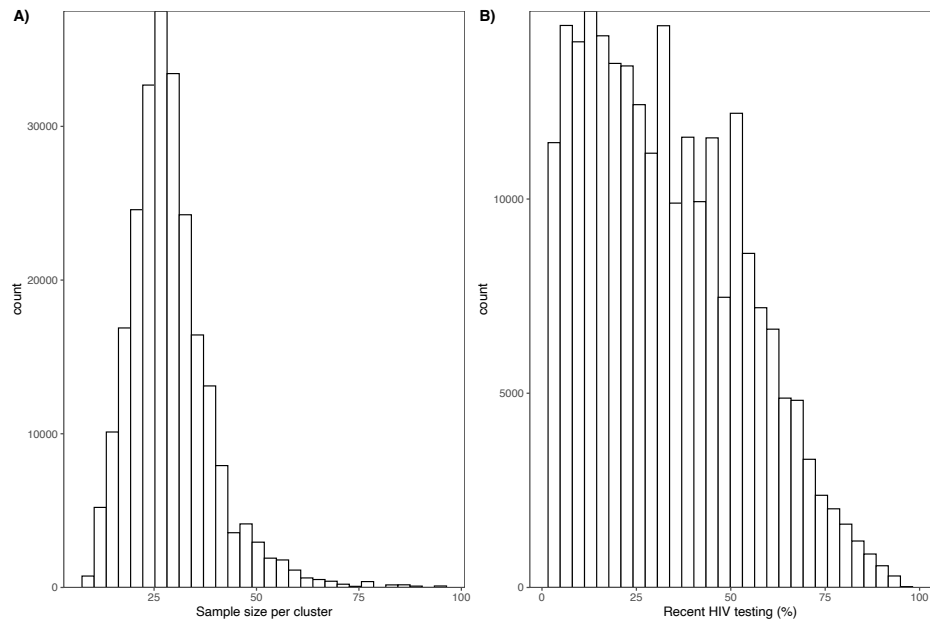

**Figure S1 (A). PSU distribution among women A) sample size and B) proportion of self-reported uptake of recent (< 12 months) HIV testing.**

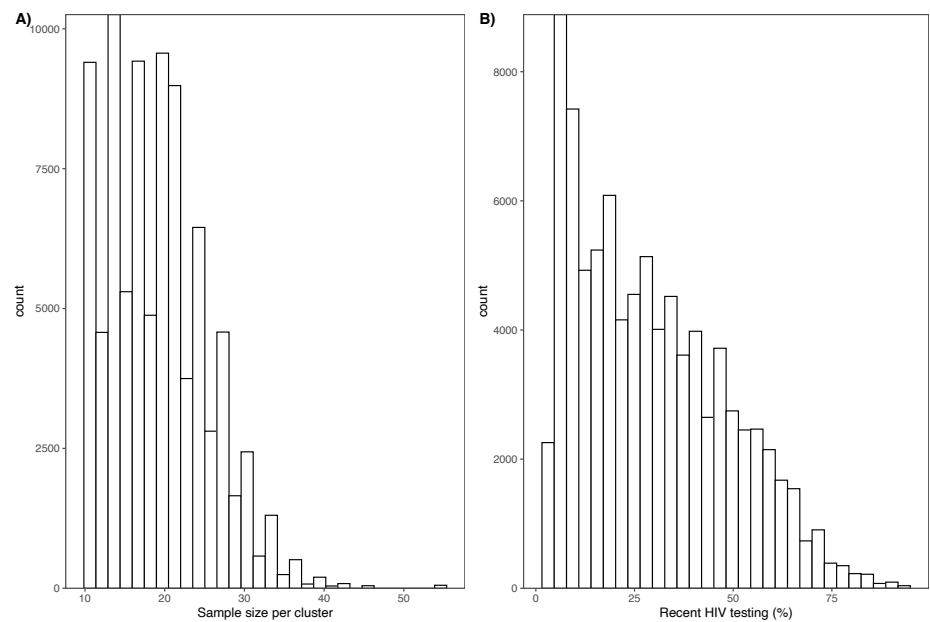

**Figure S1 (B). PSU distribution among men A) sample size and B) proportion of self-reported uptake of recent (< 12 months) HIV testing.**

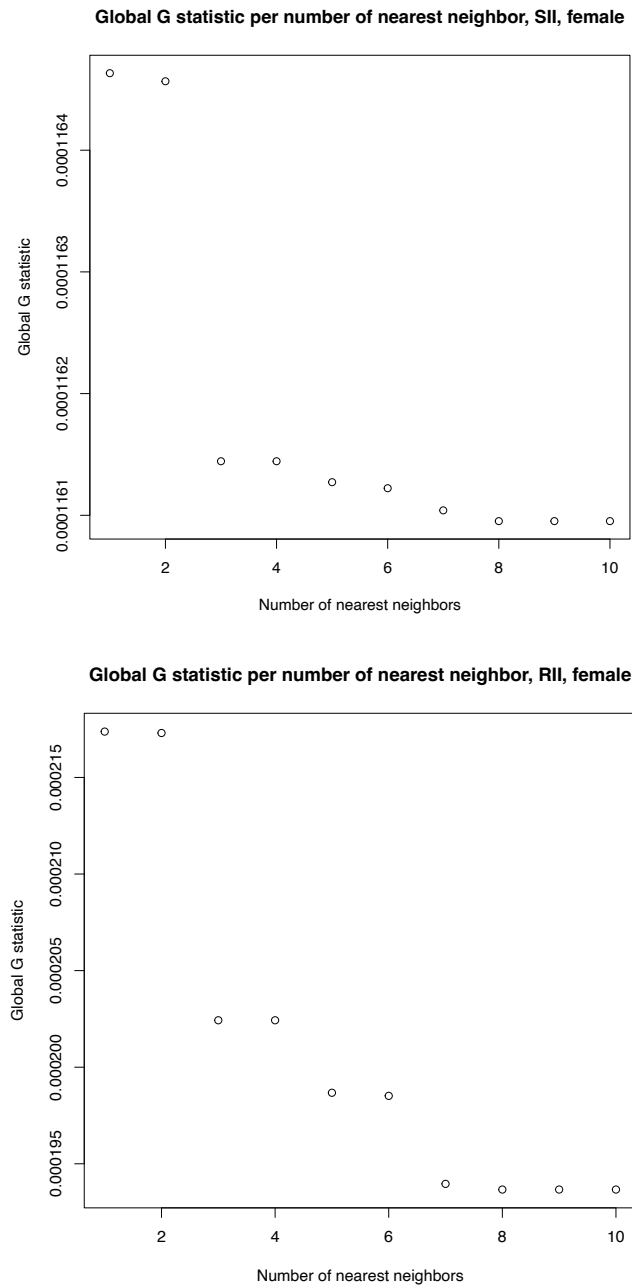

**Figure S2 (A). Global G statistic test by number of nearest neighbor (1-10) inequality scales among women.**

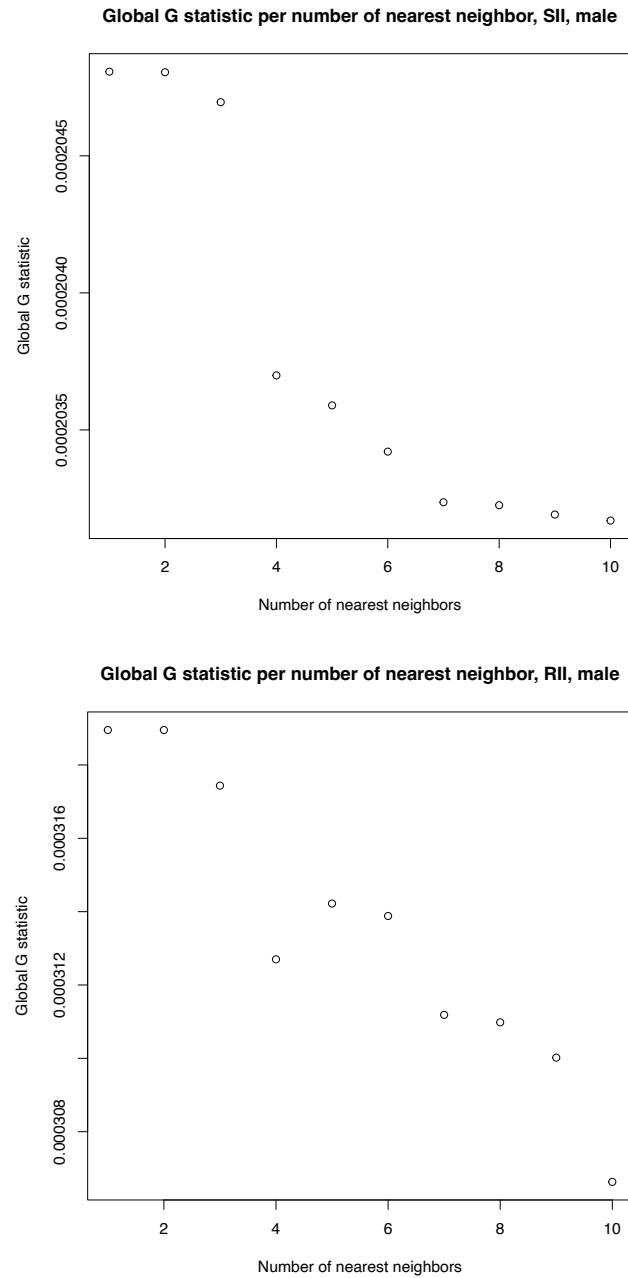

**Figure S2 (B). Global G statistic test by number of nearest neighbor (1-10) by inequality scales among men.**



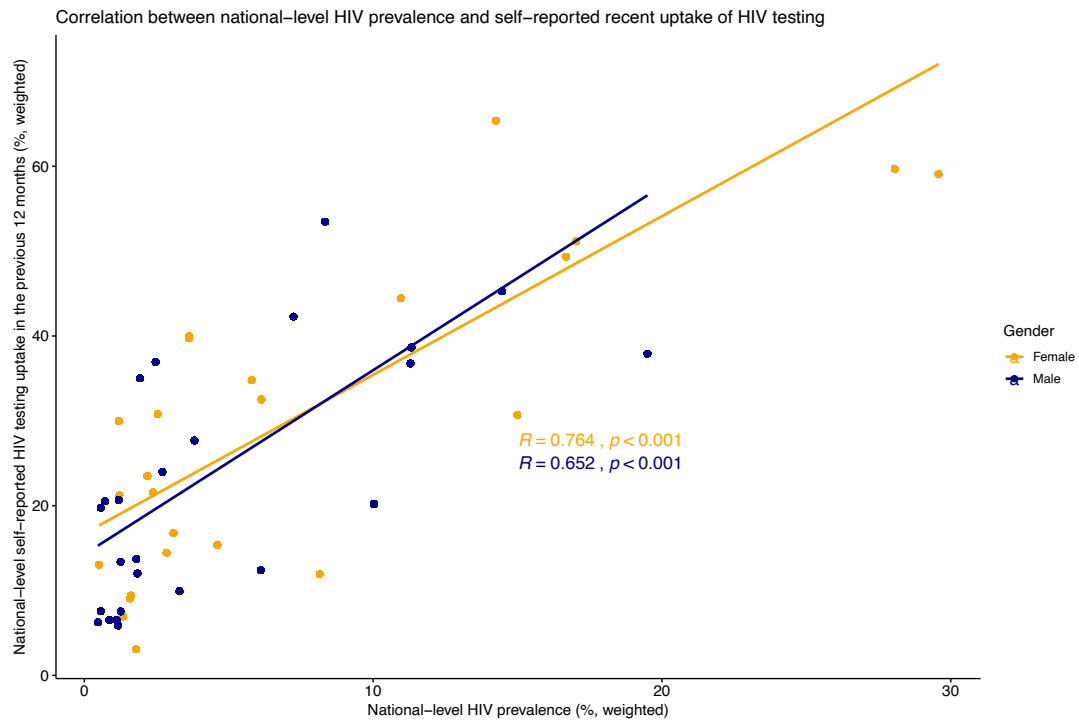

**Figure S3. Correlation (Spearman correlation coefficient R and p-value) between weighted HIV prevalence and weighted self-reported recent (< 12 months) uptake of HIV testing at the national level in 25 sub-Saharan African countries by sex.**

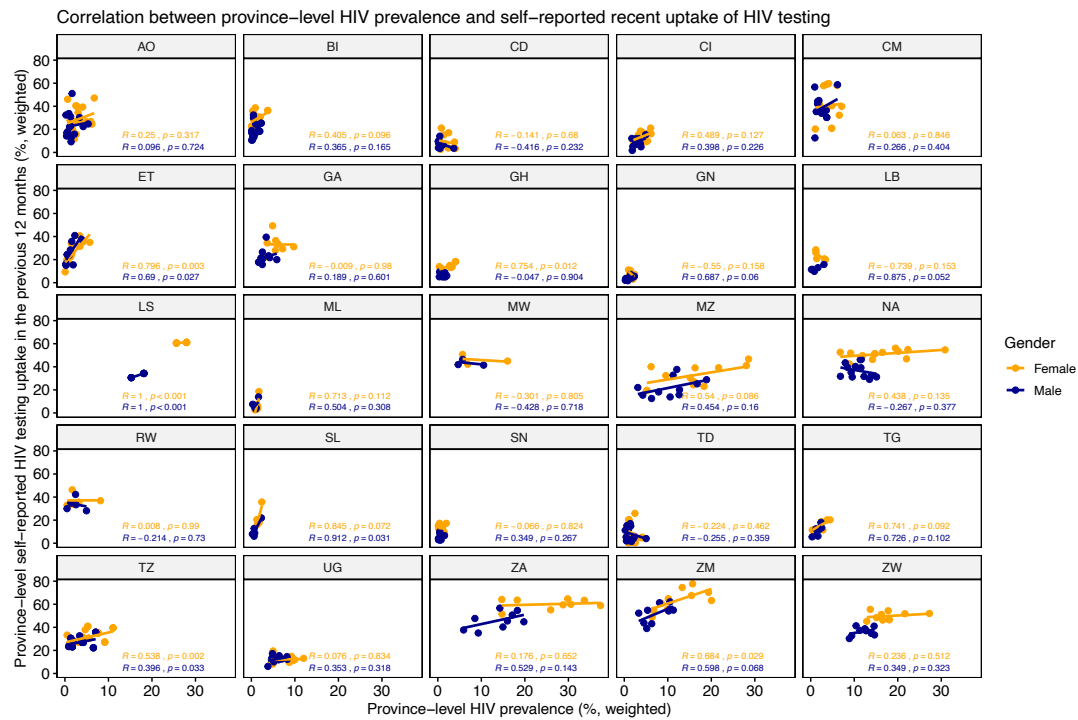

**Figure S4. Correlation (Spearman correlation coefficient R and p-value) between weighted HIV prevalence and weighted self-reported recent (< 12 months) uptake of HIV testing at the province level in 25 sub-Saharan African countries by sex. Only included regions with both the HIV biomarker and HIV testing variables.**

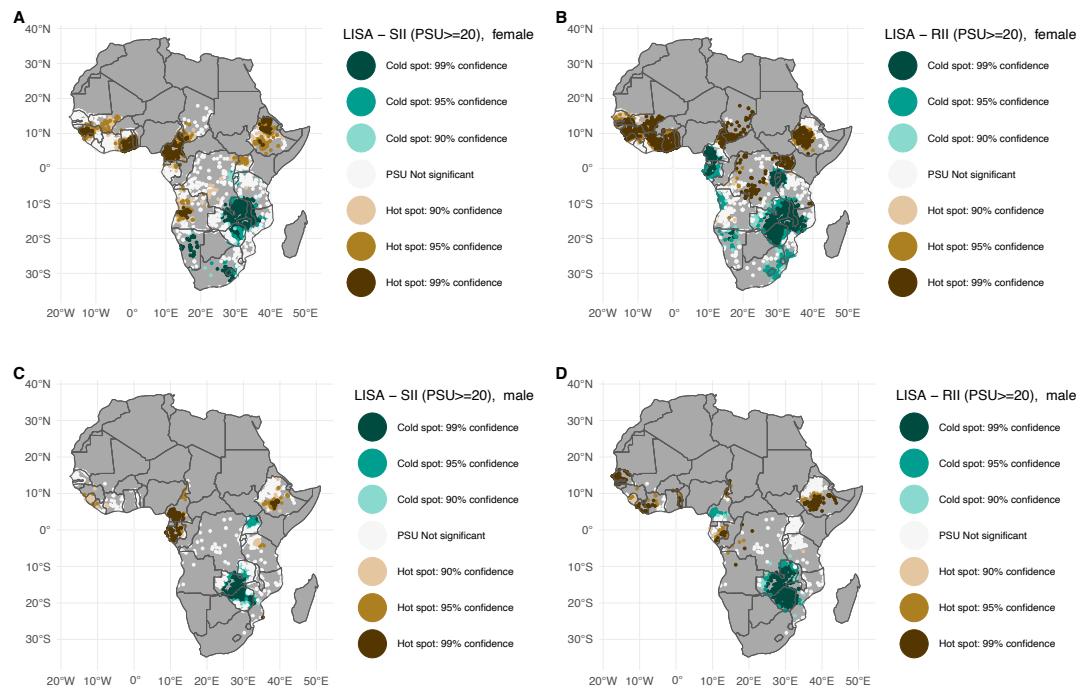

**Figure S5. Sensitivity analysis of local spatial autocorrelation of socioeconomic inequalities in self-reported (<12 months) uptake of HIV testing as Local Getis-Ord  $G_i^*$  at Primary Sampling Unit (PSU) level (1 nearest neighbor) with at least 20 participants across sub-Saharan African countries. Spatial clustering at the absolute scales (A and B) and relative scales (C and D) among women and men, respectively. Only PSUs with a sample size of at least 20 and more than one wealth quintile were included.**

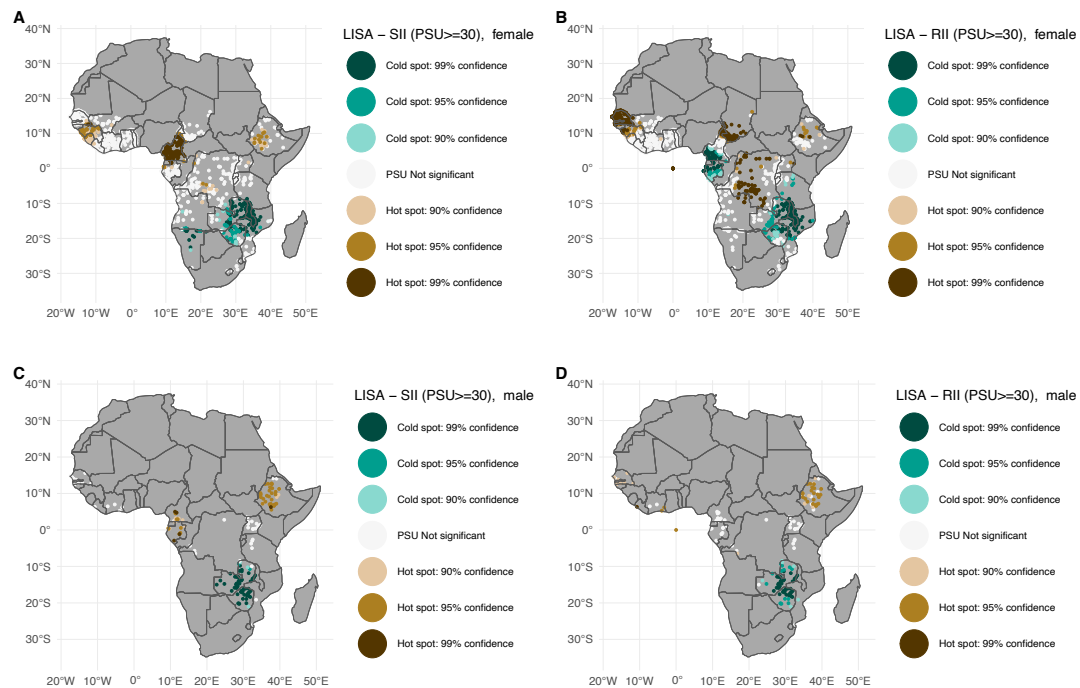

**Figure S6. Sensitivity analysis of local spatial autocorrelation of socioeconomic inequalities in self-reported (<12 months) uptake of HIV testing as Local Getis-Ord  $G_i^*$  at Primary Sampling Unit (PSU) level (1 nearest neighbor) with at least 30 participants across sub-Saharan African countries. Spatial clustering at the absolute scales (A and C) and relative scales (B and D) among women and men, respectively. Only PSUs with a sample size of at least 30 and more than one wealth quintile were included.**

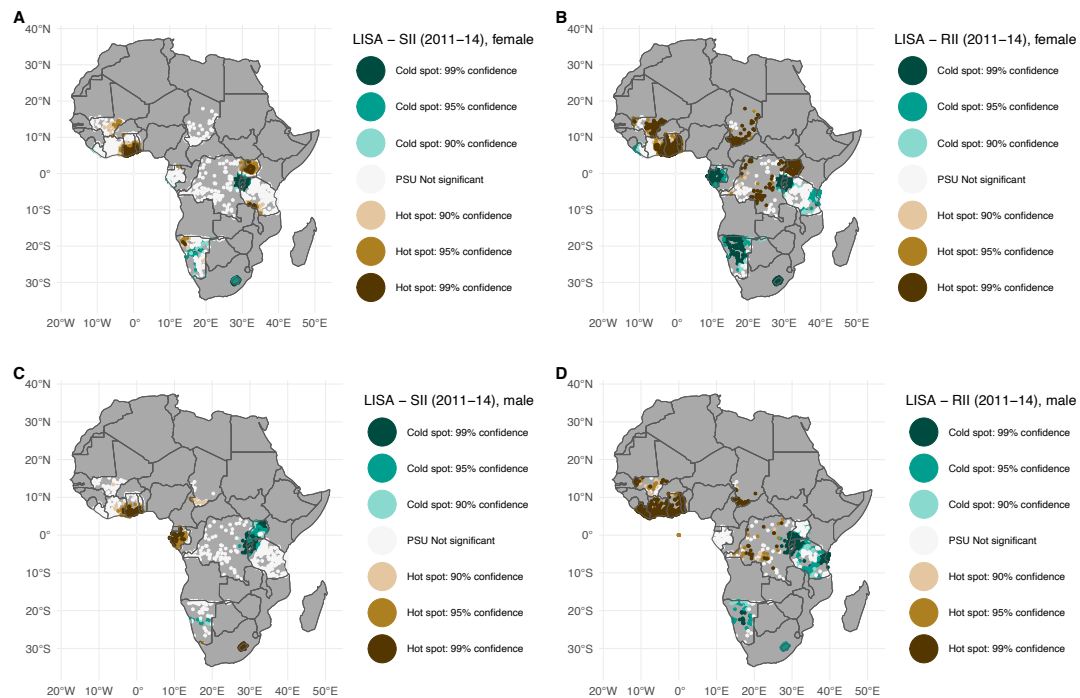

**Figure S7. Sensitivity analysis of local spatial autocorrelation of HIV testing socioeconomic inequalities as Local Getis-Ord  $G_i^*$  at PSU level (1 nearest neighbor) across sub-Saharan African countries with surveys between 2011 and 2014. Spatial clustering at the absolute scales (A and C) and relative scales (B and D) among women and men, respectively. Only PSUs with a sample size of at least 10 and more than one wealth quintile were included.**

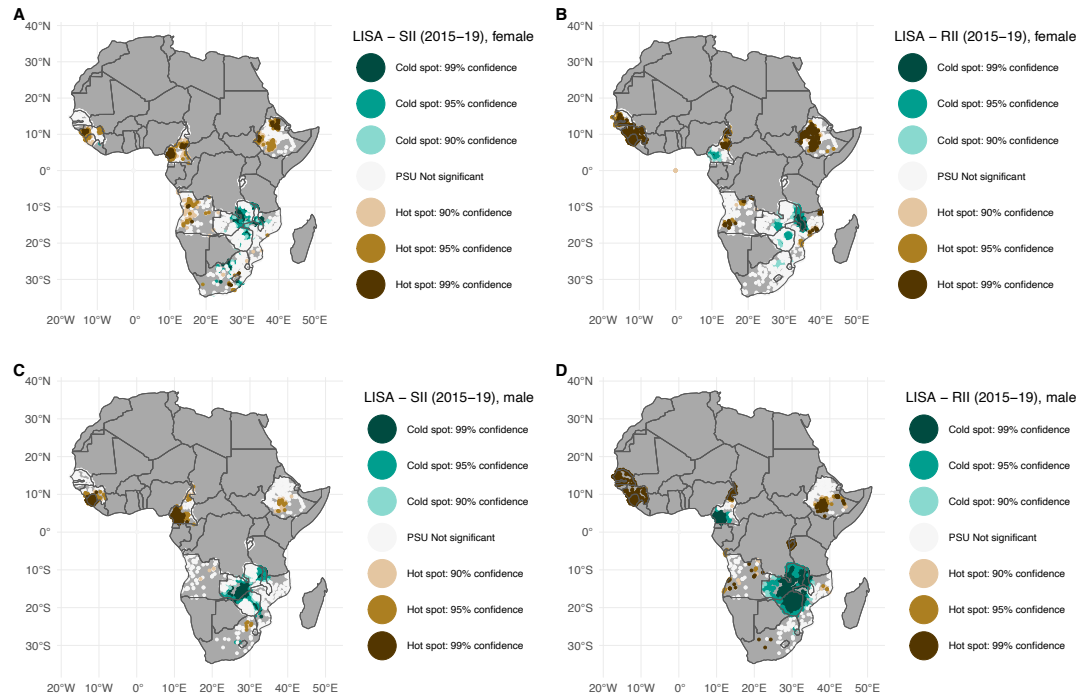

**Figure S8. Sensitivity analysis of local spatial autocorrelation of HIV testing socioeconomic inequalities as Local Getis-Ord  $G_i^*$  at PSU level (1 nearest neighbor) across sub-Saharan African countries with surveys between 2015 and 2019. Spatial clustering at the absolute scales (A and C) and relative scales (B and D) among women and men, respectively. Only PSUs with a sample size of at least 10 and more than one wealth quintile were included.**
